# Supplementary material
Source: MDPI journal article supplement (https://www.mdpi.com/1424-8247/14/8/822)
Supplement: s1 [file s1]

## Supplementary Figures

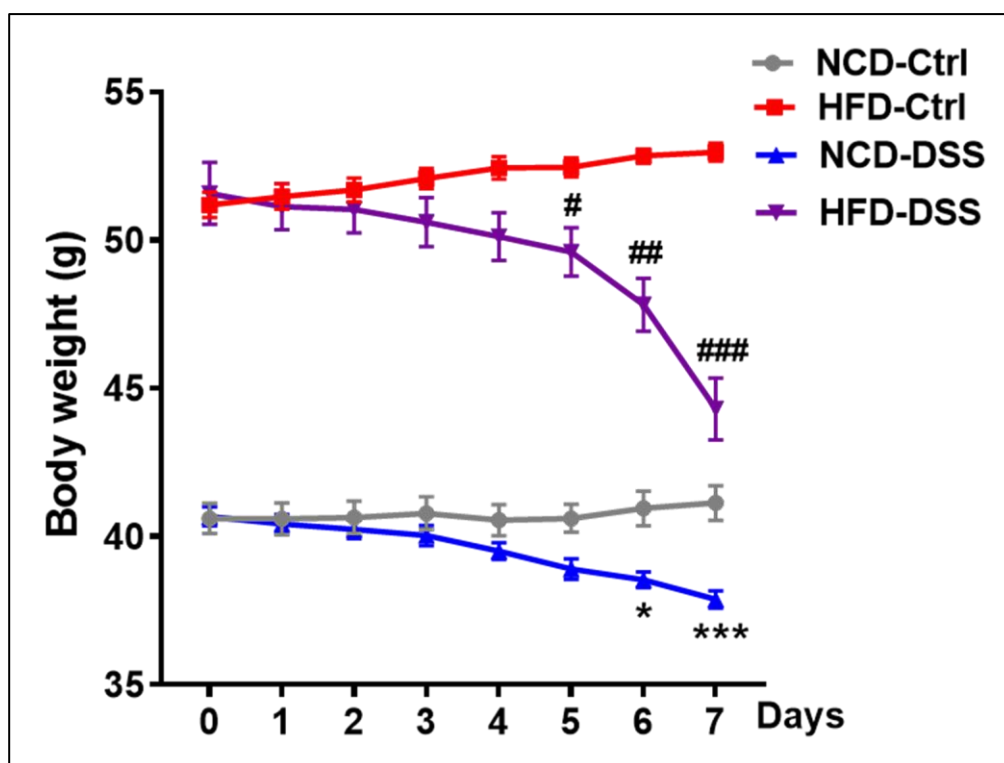

**Figure S1.** Body weight change in each group. Data are expressed as mean±SEM . \* p < 0.05, \*\*\* p < 0.001 compared with NCD-Ctrl; # p < 0.05, ## p < 0.01, ### p < 0.001 versus HFD-Ctrl.

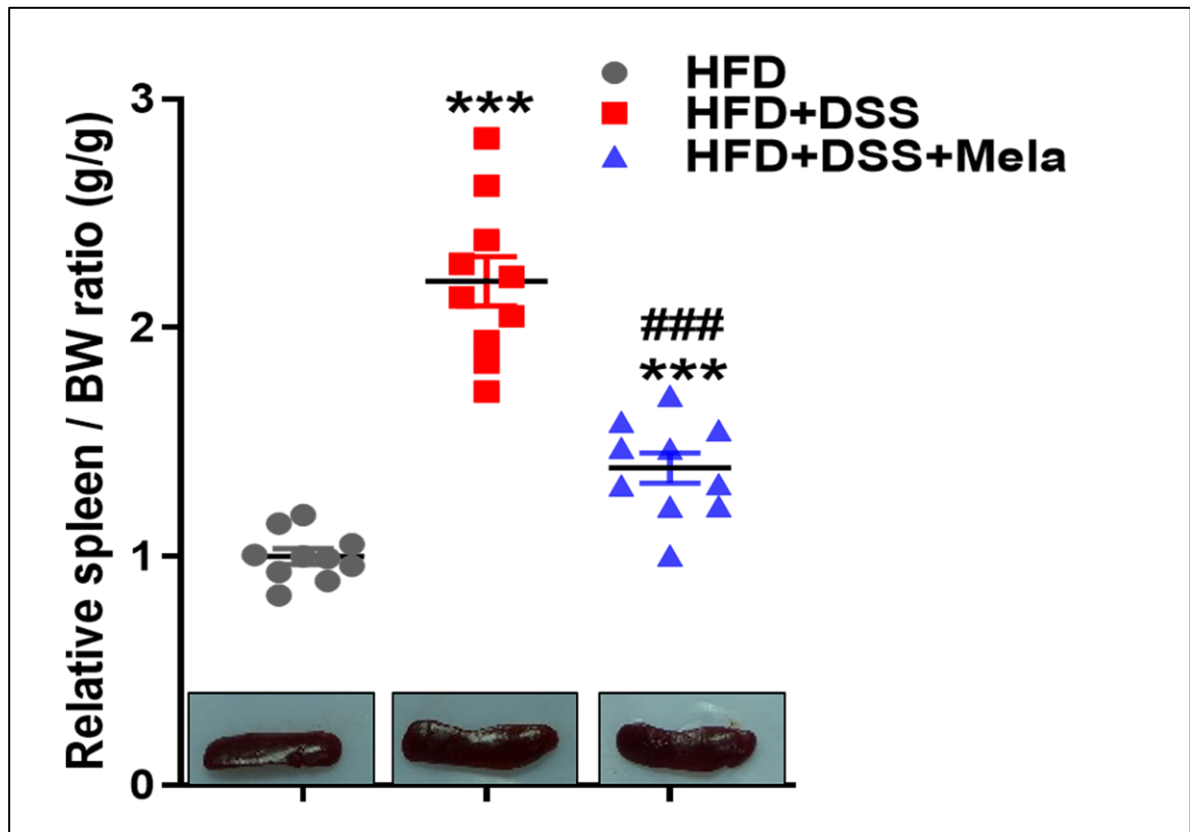

**Figure S2.** Representative images of spleen and spleen weight in each group. Data are expressed as mean±SEM . \*\*\*  $p < 0.001$  compared with HFD; ###  $p < 0.001$  versus HFD+DSS.

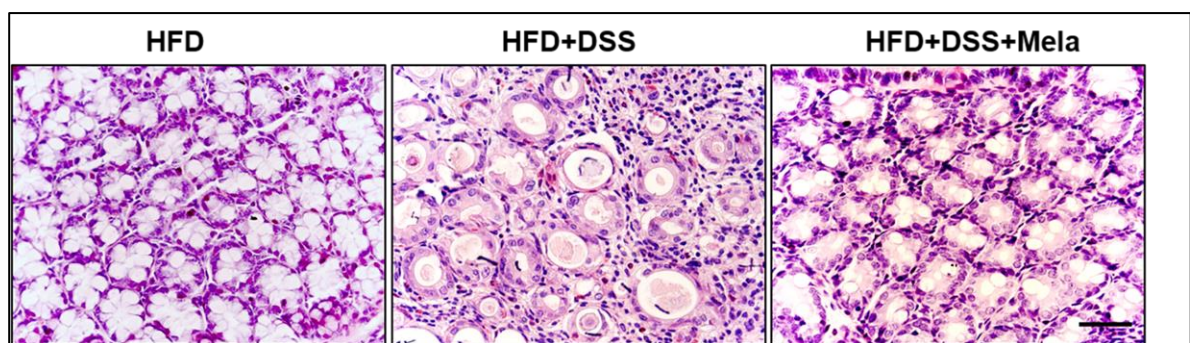

**Figure S3.** Representative H&E staining in colons (Scale bar = 50  $\mu\text{m}$ ) .

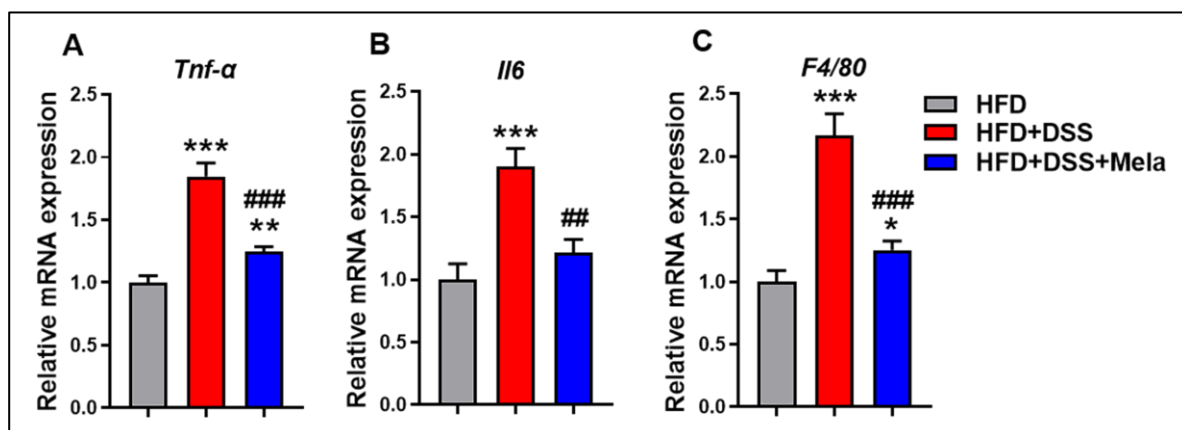

**Figure S4.** Effect of melatonin on the productions of cytokines of Mes-WAT in obese mice. (A-C) Expression of *Tnfα*(A), *Il6* (B), *F4/80* (C) in Mes-WAT. Data are expressed as mean±SEM of at least triplicated experiments from 3-5 mice. \*  $p < 0.05$ , \*\*  $p < 0.01$ , \*\*\*  $p < 0.001$  compared with HFD; ##  $p < 0.01$ , ###  $p < 0.001$  versus HFD+DSS.

## Supplementary Tables

**Supplementary Table S1. Compositions of experimental diets.**

|                     | NCD  |       | HFD (60% fat) |       |
|---------------------|------|-------|---------------|-------|
|                     | gm%  | kcal% | gm%           | kcal% |
| <b>Protein</b>      | 19.2 | 20    | 26.2          | 20    |
| <b>Fat</b>          | 4.3  | 10    | 34.9          | 60    |
| <b>Carbohydrate</b> | 67.3 | 70    | 26.3          | 20    |

| <b>Supplementary Table S2. Sequences of real-time PCR primers.</b> |                             |                |
|--------------------------------------------------------------------|-----------------------------|----------------|
| Target gene                                                        | Sequence (5'-3')            | Product Length |
| <i>Il-6</i>                                                        | F-CGACGGCCTTCCCTACTT        | 60             |
|                                                                    | R-TGGGAGTGGTATCCTCTGTGAA    |                |
| <i>Tnfa</i>                                                        | F-CATCTTCTCAAAATTCGAGTGACAA | 175            |
|                                                                    | R-TGGGAGTAGACAAGGTACAACCC   |                |
| <i>Mcp1</i>                                                        | F-CAACTCTCACTGAAGCCAGCTCT   | 69             |
|                                                                    | R-CAGGCCCAAGAAGCATGACA      |                |
| <i>F4/80</i>                                                       | F-GCTGTGAGATTGTGGAAGCA      | 166            |
|                                                                    | R-ATGGCCAAGGCAAGACATAC      |                |
| <i>Bax</i>                                                         | F-TTGCCCTCTTCTACTTTGCTAG    | 81             |
|                                                                    | R-CCATGATGGTTCTGATCAGCTC    |                |
| <i>Bcl2</i>                                                        | F-GATGACTTCTCTCGTCGCTAC     | 156            |
|                                                                    | R-GAACTCAAAGAAGGCCACAATC    |                |
| <i>Grp78</i>                                                       | F-ATGATGAAGTTCCTGTGGTGG     | 174            |
|                                                                    | R-CTGATCGTTGGCTATGATCTCC    |                |
| <i>Xbp1</i>                                                        | F-TTGCCTCTTCAGATTCTGAGTC    | 85             |
|                                                                    | R-GGGGAAGGACATTTGAAAAACA    |                |
| <i>Atf4</i>                                                        | F-AGTTTAGAGCTAGGCAGTGAAG    | 135            |
|                                                                    | R-CATACAGATGCCACTGTCATTG    |                |
| <i>Nrf2</i>                                                        | F-CAGCCATGACTGATTAAAGCAG    | 107            |
|                                                                    | R-CAGCTGCTTGTTTTTCGGTATTA   |                |
| <i>Ho-1</i>                                                        | F-TCCTTGTACCATATCTACACGG    | 198            |
|                                                                    | R-GAGACGCTTTACATAGTGCTGT    |                |
| <i>Nqo1</i>                                                        | F-GAAGACATCATTCAACTACGCC    | 179            |
|                                                                    | R-GAGATGACTCGGAAGGATACTG    |                |
| <i>Zo-1</i>                                                        | F-CTGGTGAAGTCTCGGAAAAATG    | 97             |
|                                                                    | R-CATCTCTTGCTGCCAAACTATC    |                |
| <i>Cldn</i>                                                        | F-TTATGGTCATCAGCATCATCGT    | 111            |

|                |                           |     |
|----------------|---------------------------|-----|
|                | R-TGATCATGATCTTGGCCTTGAC  |     |
| <i>Ocln</i>    | F-TGCTTCATCGCTTCCTTAGTAA  | 155 |
|                | R-GGGTTCACCTCCCATTATGTACA |     |
| <i>Tff3</i>    | F-CTCTGGGATAGCTGCAGATTAC  | 193 |
|                | R-TCAAAATGTGCATTCTGTCTCC  |     |
| <i>Hsl</i>     | F-CTCACAGTTACCATCTCACCTC  | 122 |
|                | R-GATTTTGCCAGGCTGTTGAGTA  |     |
| <i>Atgl</i>    | F-CAGAGATGGACTTCGATTCCTT  | 181 |
|                | R-CAGGTGCTCTAGAATTCGATCT  |     |
| <i>Cd36</i>    | F:GGAAGTGTGGGCTCATTGC     | 68  |
|                | R:CATGAGAATGCCTCCAAACAC   |     |
| <i>Fatp1</i>   | F:CGCTTTCTGCGTATCGTCTG    | 120 |
|                | R:GATGCACGGGATCGTGTCT     |     |
| <i>Atg5</i>    | F-GATGGGATTGCAAAATGACAGA  | 133 |
|                | R-GAAAGGTCTTTCAGTCGTTGTC  |     |
| <i>Atg7</i>    | F-TGTATAACACCAACACACTCGA  | 197 |
|                | R-GGCAGGATAGCAAAACCAATAG  |     |
| <i>Beclin1</i> | F-TAATAGCTTCACTCTGATCGGG  | 217 |
|                | R-CAAACAGCGTTTGTAGTTCTGA  |     |
| <i>Tfeb</i>    | F-CACAGGTTACCCCGATACC     | 96  |
|                | R-AGGGAGTCATCTAGGAGCATT   |     |
| <i>Gapdh</i>   | F-GTCGTGGATCTGACGTGCC     | 72  |
|                | R-TGCCTGCTTCACCACCTTCT    |     |

| Supplementary Table S3. List of antibodies used in the study |             |                |             |               |
|--------------------------------------------------------------|-------------|----------------|-------------|---------------|
| Antigen name                                                 | Company     | Identifier     | Application | Dilution      |
| $\beta$ -actin                                               | Sigma       | A1978          | WB          | 1:5000        |
| Nrf2                                                         | proteintech | 16396-1-AP     | WB          | 1:1000        |
| Ho-1                                                         | proteintech | 10701-1-AP     | WB          | 1:1000        |
| Zo-1                                                         | proteintech | 21773-1-AP     | WB/IF       | 1:5000/1:1000 |
| Atg5                                                         | proteintech | 10181-2-AP     | WB/IF       | 1:1000/1:100  |
| LC3                                                          | proteintech | 14600-1-AP     | WB          | 1:1000        |
| Bax                                                          | proteintech | 50599-2-Ig     | WB          | 1:5000        |
| CD36                                                         | abcam       | ab133625       | WB          | 1:1000        |
| Fatp1                                                        | Novus       | H00376497-D01P | WB          | 1:1000        |

WB, Western blot;  
IF, Immunofluorescence
